# Supplementary material for: Terpene Profiles Composition and Micromorphological Analysis on Two Wild Populations of Helichrysum spp. from the Tuscan Archipelago (Central Italy)
Source: MDPI journal article supplement (doi:10.3390/plants11131719), 2022-06-29
Supplement: s1 [file s1]

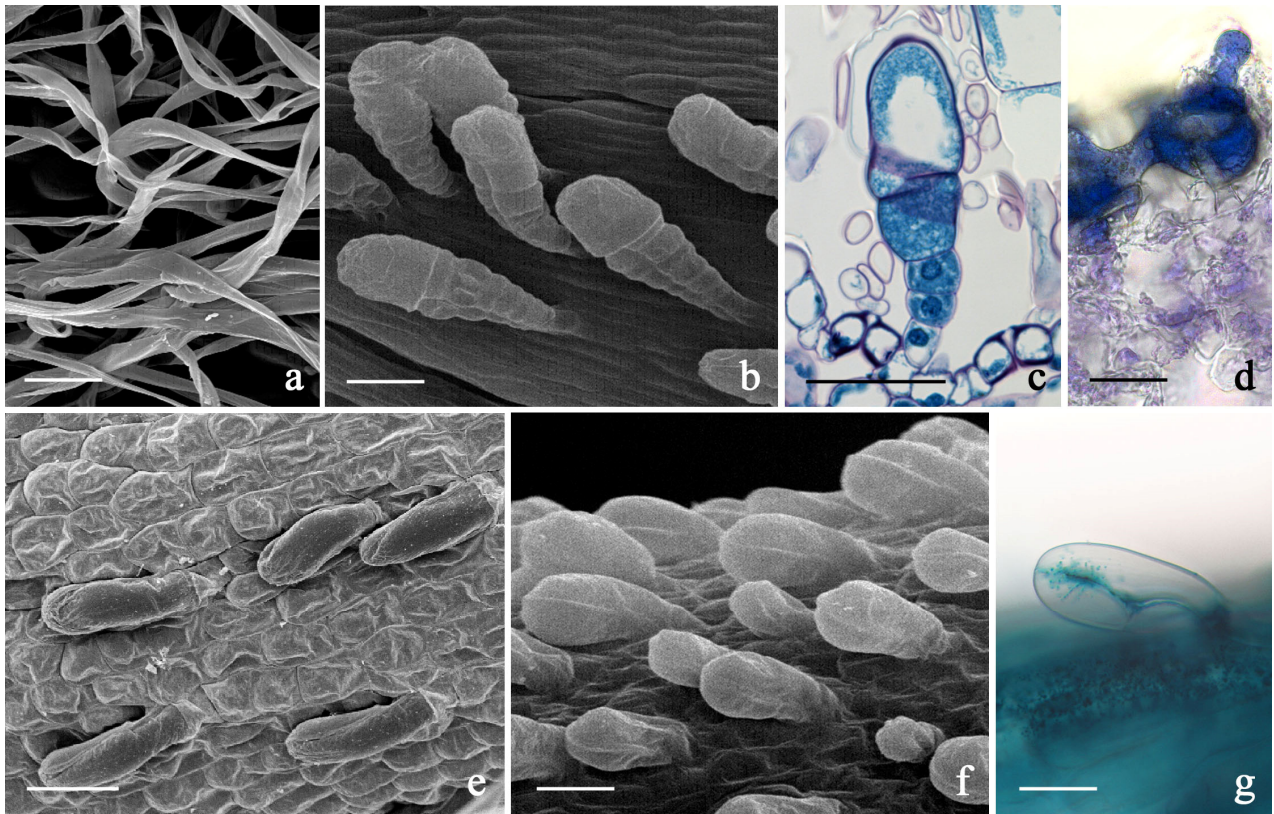

**Figure S1.** a-f. Trichomes morphotypes in the investigated *Helichrysum* populations. a. SEM micrograph showing the long filamentous non-glandular hairs. b-d. Micrographs showing the club-shaped glandular trichome morphotypes: general view (b, SEM); longitudinal section stained with Toluidine Blue (c, LM); terpenoidic nature of the secreted material stained with Nadi reagent (d, LM). e-g. Micrographs showing the duplex glandular trichome morphotypes: general views of the ovary surface in population A samples (e, SEM) and population B samples (f, SEM); muco-polisaccharidic nature of the secreted material stained with Alcian (g, LM). Scale bars = 25  $\mu$ m.

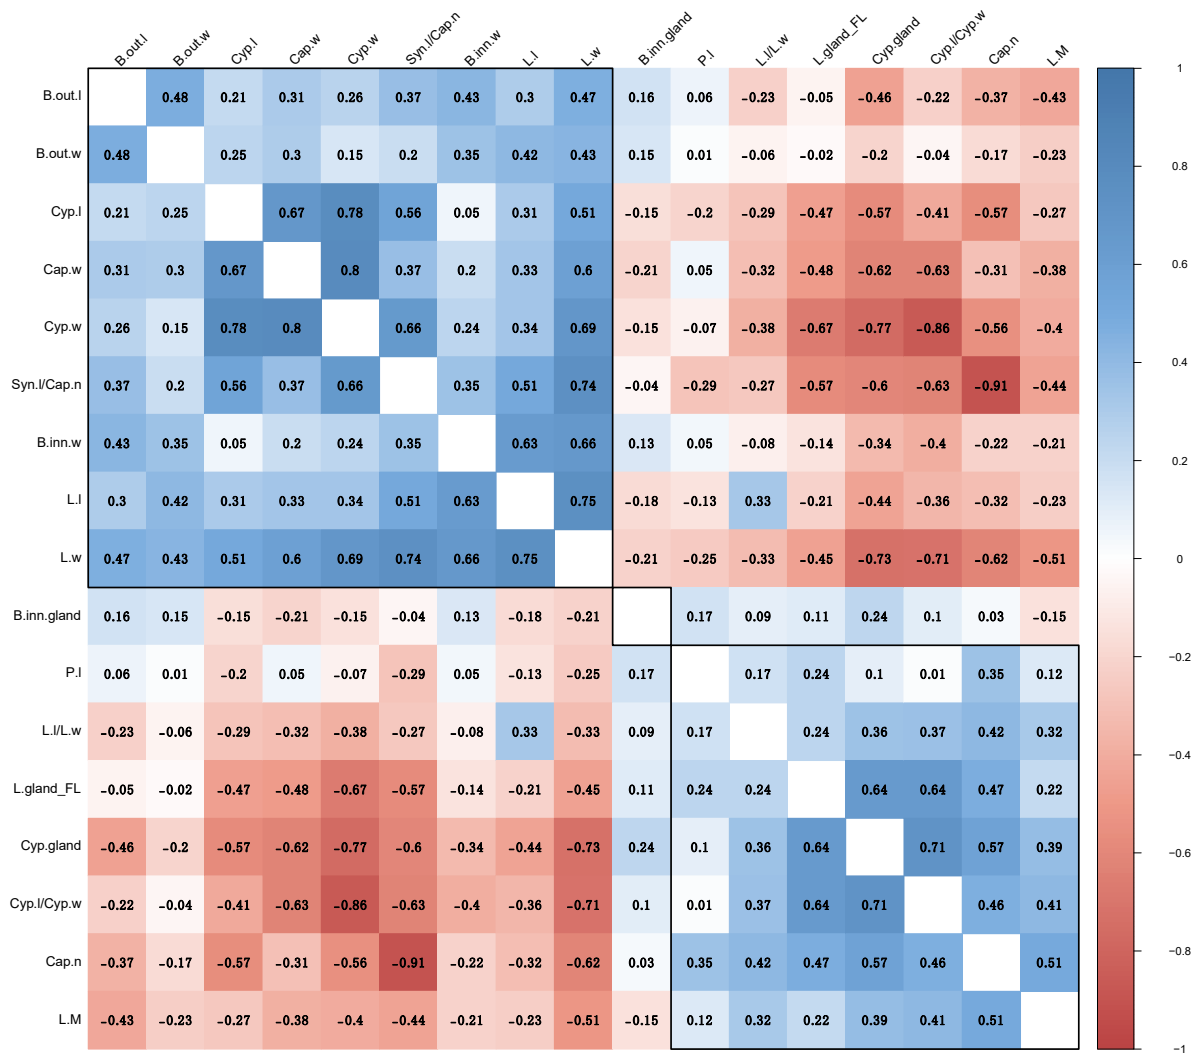

**Figure S2.** Spearman's correlation coefficients among morphological significant characters.

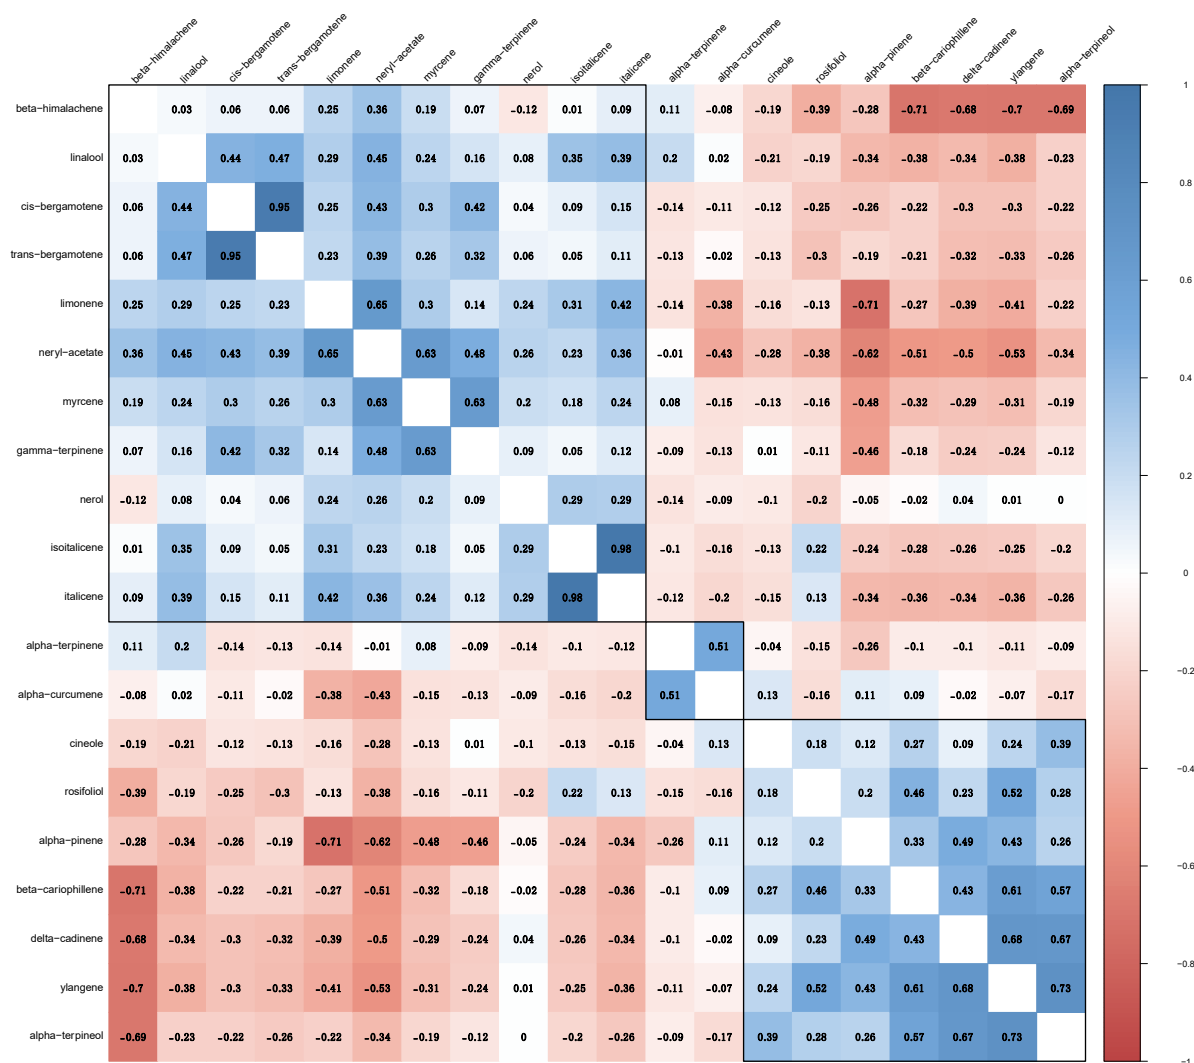

**Figure S3.** Pearson's correlation coefficients among phytochemical significant compounds of flower tissue.

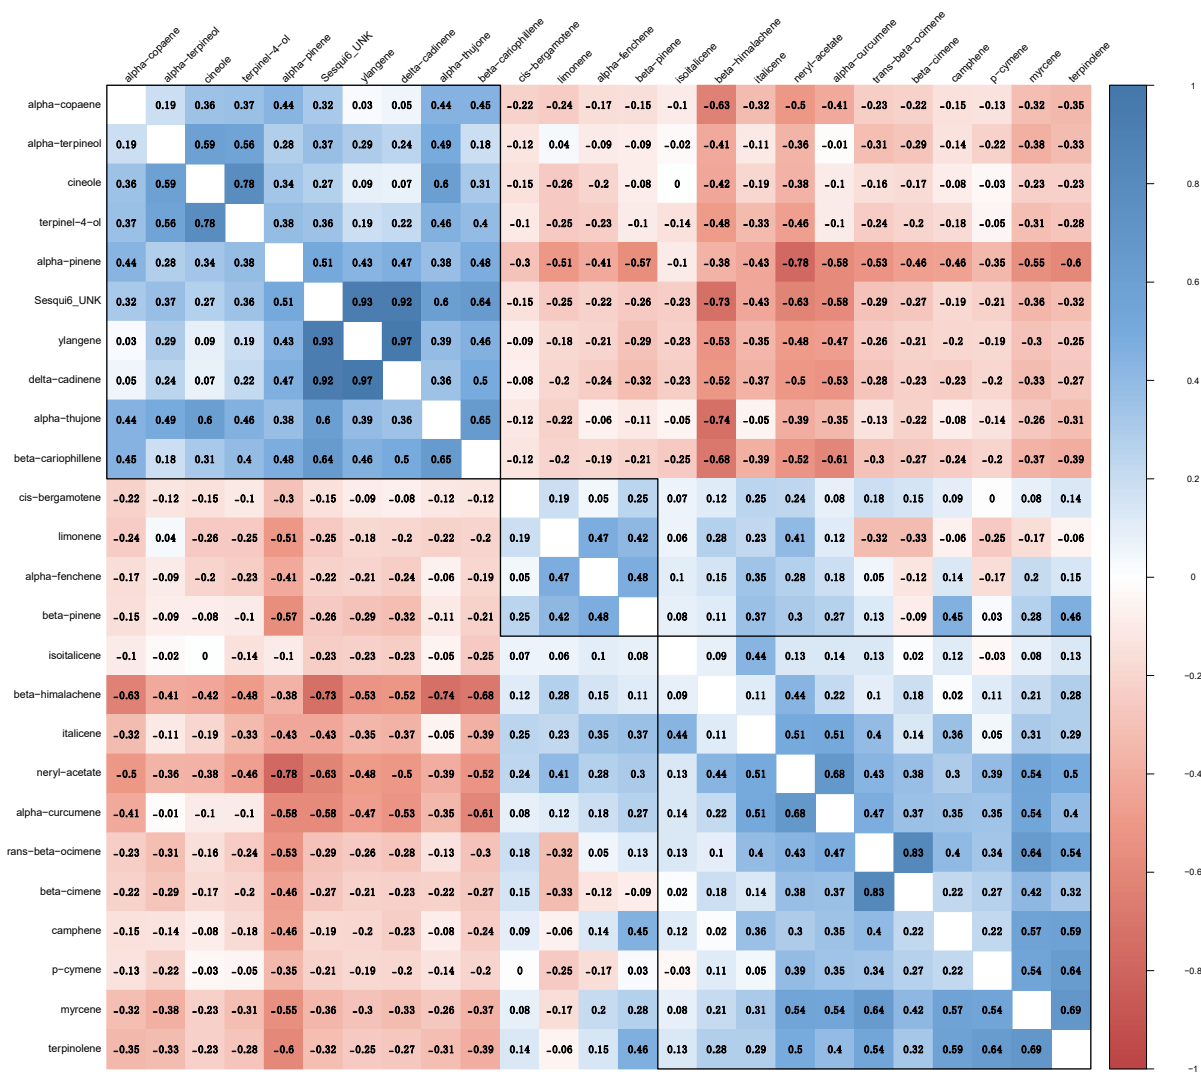

Figure S4. Pearson's correlation coefficients among phytochemical significant compounds of leaves tissue

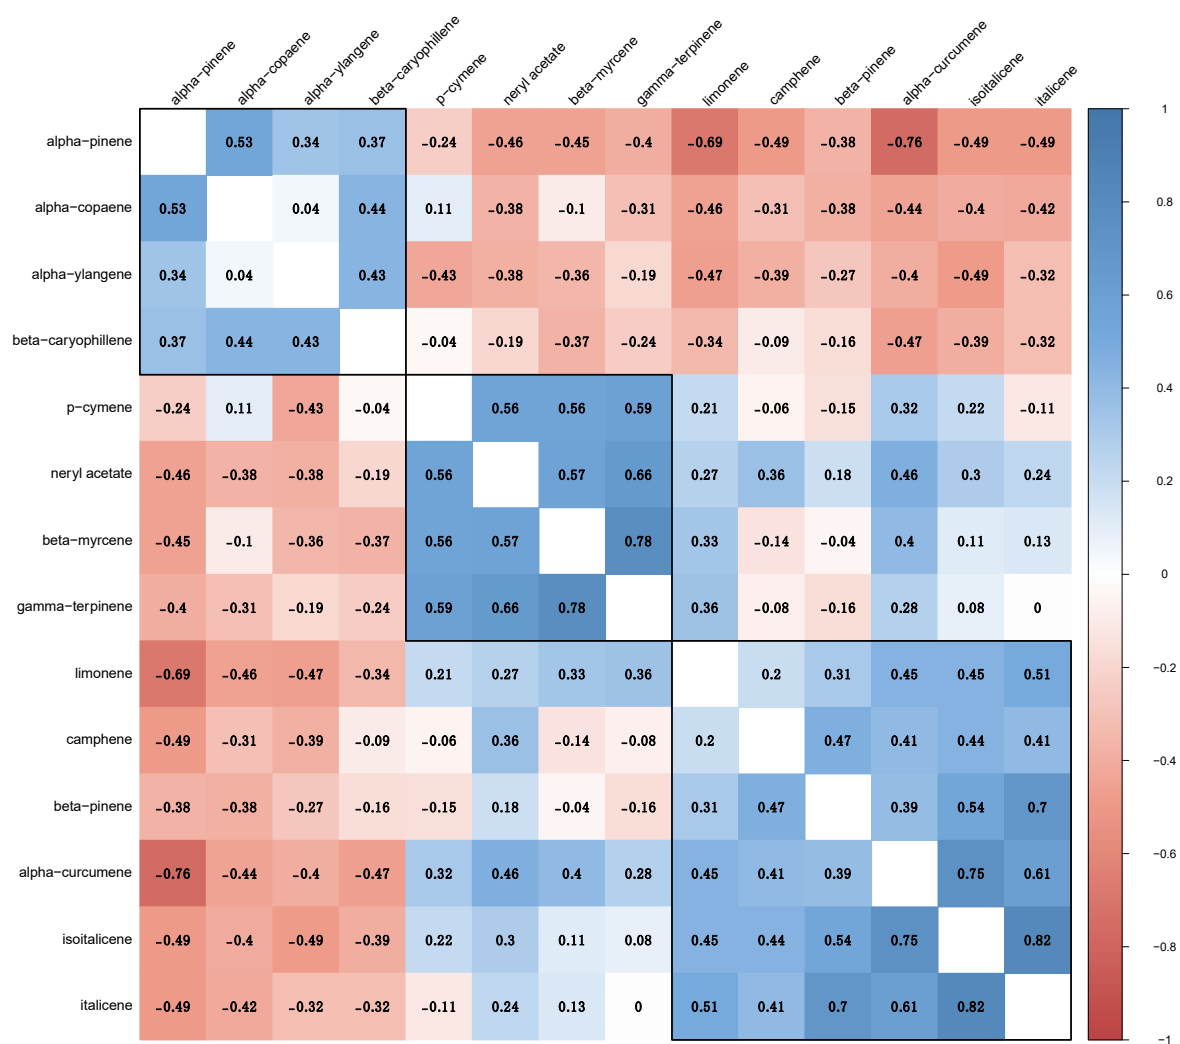

**Figure S5.** Pearson's correlation coefficients among phytochemical significant compounds of bark tissue.

**Table S1.** Contribution of morphological characters on the principal components (Dim.). The values reported are the square coordinates of the variables representing the contribution of the variables on the principal components. A high value indicates a good representation of the variable on the principal component.

|                        | Dim.1 | Dim.2 | Dim.3 | Dim.4 | Dim.5 |
|------------------------|-------|-------|-------|-------|-------|
| L.l                    | 0.40  | 0.00  | 0.16  | 0.10  | 0.04  |
| L.w                    | 0.78  | 0.00  | 0.05  | 0.02  | 0.02  |
| Cap.n                  | 0.47  | 0.03  | 0.05  | 0.24  | 0.01  |
| Cap.w                  | 0.55  | 0.01  | 0.13  | 0.01  | 0.04  |
| B.out.l                | 0.05  | 0.66  | 0.11  | 0.00  | 0.05  |
| B.out.w                | 0.05  | 0.55  | 0.00  | 0.00  | 0.21  |
| B.inn.w                | 0.04  | 0.09  | 0.33  | 0.35  | 0.05  |
| B.inn.gland            | 0.09  | 0.31  | 0.06  | 0.00  | 0.28  |
| P.l                    | 0.08  | 0.19  | 0.30  | 0.13  | 0.14  |
| Cyp.gland              | 0.72  | 0.00  | 0.02  | 0.02  | 0.00  |
| Cyp.l                  | 0.57  | 0.00  | 0.08  | 0.02  | 0.00  |
| Cyp.w                  | 0.77  | 0.01  | 0.05  | 0.00  | 0.05  |
| L.gland_FL             | 0.37  | 0.11  | 0.01  | 0.03  | 0.01  |
| L.M                    | 0.23  | 0.03  | 0.06  | 0.28  | 0.16  |
| Proportion of variance | 36.96 | 14.12 | 99.70 | 86.49 | 7.63  |
| Cumulative proportion  | 36.96 | 51.09 | 61.06 | 69.71 | 70.47 |

**Table S2.** Phytochemical analysis of flower, leaves and bark tissue from Capo d'Enfola (A) and Monte Capanne (B) population in Elba Island. Data are the mean of individuals  $\pm$  SD. nd = not detected, tr: trace ( $< 0.1\%$ ). *H. litoreum* is reported in population A, and *H. italicum* subsp. *italicum* in population B. <sup>a</sup> MH = Monoterpene Hydrocarbon; OM = Oxygenated Monoterpene;; SH = Sesquiterpene Hydrocarbons; OS = Oxygenated Sesquiterpene. <sup>b</sup> Kovant's Retention Index. <sup>c</sup> Identification: "RI; MS" means that the compound was tentatively identified by Kovant's Retention Index (RI) and matches with database spectra in the NIST11 mass spectral library (MS); "Std" means that the identification of the molecules was confirmed by comparison of RI and the mass spectra with those of available standard compounds.

| N    | Compounds                  | Class of Compounds <sup>a</sup> | RT    | RI <sup>b</sup> | Flower            |                   | Leaves            |                   | Bark              |                   | ID <sup>c</sup> |
|------|----------------------------|---------------------------------|-------|-----------------|-------------------|-------------------|-------------------|-------------------|-------------------|-------------------|-----------------|
|      |                            |                                 |       |                 | A                 | B                 | A                 | B                 | A                 | B                 |                 |
| [1]  | 2-bornene                  | MH                              | 9.17  | 985             | 0.21 $\pm$ 0.16   | 0.24 $\pm$ 0.29   | nd                | nd                | nd                | nd                | RI;MS           |
| [2]  | $\alpha$ -pinene           | MH                              | 10.97 | 1030            | 58.64 $\pm$ 22.03 | 22.12 $\pm$ 18.93 | 55.1 $\pm$ 18.45  | 14.62 $\pm$ 7.74  | 53.41 $\pm$ 20.38 | 15.53 $\pm$ 15.02 | Std             |
| [3]  | $\alpha$ -fenchene         | MH                              | 12.09 | 1072            | 2.17 $\pm$ 8.25   | 1.6 $\pm$ 1.91    | 3.41 $\pm$ 1.65   | 5.42 $\pm$ 3.33   | 15.83 $\pm$ 18.19 | 6.67 $\pm$ 7.3    | Std             |
| [4]  | camphene                   | MH                              | 12.15 | 1081            | 11.3 $\pm$ 16     | 4.08 $\pm$ 3.17   | 1.4 $\pm$ 1.48    | 2.68 $\pm$ 2.32   | 3.37 $\pm$ 2.49   | 19.3 $\pm$ 16.36  | Std             |
| [5]  | $\beta$ -pinene            | MH                              | 13.47 | 1124            | 2.14 $\pm$ 1.92   | 3.32 $\pm$ 2.82   | 2.86 $\pm$ 2.01   | 4.59 $\pm$ 1.72   | 0.56 $\pm$ 0.6    | 1.86 $\pm$ 1.72   | Std             |
| [6]  | myrcene                    | MH                              | 14.72 | 1172            | 0.31 $\pm$ 0.4    | 2.19 $\pm$ 2.41   | 0.56 $\pm$ 0.88   | 2.64 $\pm$ 1.95   | 1.36 $\pm$ 1.43   | 2.87 $\pm$ 2.77   | Std             |
| [7]  | $\alpha$ -phellandrene     | MH                              | 15.31 | 1179            | tr                | tr                | 0.04 $\pm$ 0.04   | 0.1 $\pm$ 0.2     | nd                | nd                | Std             |
| [8]  | $\alpha$ -terpinene        | MH                              | 15.75 | 1195            | 5.16 $\pm$ 13.4   | 3.51 $\pm$ 10.01  | 1.87 $\pm$ 3.91   | 1.38 $\pm$ 1.19   | tr                | tr                | Std             |
| [9]  | limonene                   | MH                              | 16.00 | 1215            | 18.27 $\pm$ 12.11 | 51.37 $\pm$ 16.24 | 30.85 $\pm$ 14.34 | 47.76 $\pm$ 21.38 | 22.11 $\pm$ 15.08 | 48.79 $\pm$ 18.41 | Std             |
| [10] | 1,8-cineole                | OM                              | 16.66 | 1227            | 1.42 $\pm$ 2.96   | 0.12 $\pm$ 0.57   | 1.91 $\pm$ 2.85   | 0.19 $\pm$ 0.27   | tr                | tr                | Std             |
| [11] | (E)- $\beta$ -ocimene      | MH                              | 17.11 | 1250            | nd                | nd                | 0.29 $\pm$ 0.59   | 2.78 $\pm$ 7.9    | nd                | nd                | RI;MS           |
| [12] | (Z)- $\beta$ -ocimene      | MH                              | 17.66 | 1251            | nd                | nd                | 0.35 $\pm$ 0.76   | 11.27 $\pm$ 16.79 | nd                | nd                | Std             |
| [13] | $\gamma$ -terpinene        | MH                              | 18.00 | 1258            | 1.75 $\pm$ 2.05   | 11.52 $\pm$ 16.14 | 1.37 $\pm$ 1.69   | 2.3 $\pm$ 5.18    | 0.52 $\pm$ 0.6    | 1.21 $\pm$ 1.08   | Std             |
| [14] | p-cymene                   | MH                              | 18.46 | 1260            | tr                | tr                | 1.07 $\pm$ 1.55   | 5.74 $\pm$ 9.65   | 2.81 $\pm$ 3.92   | 3.74 $\pm$ 2.38   | Std             |
| [15] | terpinolene                | MH                              | 19.90 | 1298            | tr                | tr                | 0.76 $\pm$ 0.51   | 1.58 $\pm$ 0.88   | nd                | nd                | Std             |
| [16] | $\alpha$ -ylangene         | SH                              | 24.27 | 1507            | 9.69 $\pm$ 9.35   | tr                | 3.47 $\pm$ 4.33   | 0.02 $\pm$ 0.1    | 4.56 $\pm$ 5.3    | tr                | RI;MS           |
| [17] | $\alpha$ -copaene          | SH                              | 24.50 | 1515            | 0.09 $\pm$ 0.35   | tr                | 16.08 $\pm$ 19.22 | 0 $\pm$ 0.01      | 12.54 $\pm$ 13.57 | 0.09 $\pm$ 0.3    | RI;MS           |
| [18] | $\alpha$ -thujone          | OM                              | 24.70 | 1519            | nd                | nd                | 1.39 $\pm$ 1.48   | 0.3 $\pm$ 0.57    | nd                | nd                | Std             |
| [19] | isoitalicene               | SH                              | 25.00 | 1521            | 0.2 $\pm$ 0.18    | 2.05 $\pm$ 2.9    | 0.94 $\pm$ 2.88   | 1.45 $\pm$ 1.36   | 3.84 $\pm$ 6.89   | 7.74 $\pm$ 3.12   | RI;MS           |
| [20] | linalool                   | OM                              | 25.55 | 1546            | 0.82 $\pm$ 2.02   | 3.66 $\pm$ 2.97   | 0.77 $\pm$ 1.86   | 0.83 $\pm$ 0.78   | nd                | nd                | Std             |
| [21] | italicene                  | SH                              | 25.98 | 1573            | 0.94 $\pm$ 0.83   | 7.21 $\pm$ 7.27   | 1.63 $\pm$ 2.06   | 5.44 $\pm$ 4.7    | 1.09 $\pm$ 0.87   | 3.85 $\pm$ 1.83   | RI;MS           |
| [22] | (Z)- $\alpha$ -bergamotene | SH                              | 26.10 | 1580            | 0.36 $\pm$ 0.88   | 3 $\pm$ 3.94      | 0.34 $\pm$ 0.71   | 1.18 $\pm$ 1.76   | nd                | nd                | RI;MS           |
| [23] | (E)- $\alpha$ -bergamotene | SH                              | 26.50 | 1591            | 0.51 $\pm$ 0.94   | 1.97 $\pm$ 2.5    | nd                | nd                | nd                | nd                | RI;MS           |
| [24] | terpinen-4-ol              | OM                              | 27.33 | 1616            | 0.49 $\pm$ 0.53   | 0.65 $\pm$ 0.89   | 0.37 $\pm$ 0.5    | tr                | nd                | nd                | Std             |
| [25] | $\beta$ -cariophyllene     | SH                              | 27.45 | 1627            | 18.16 $\pm$ 17.64 | 1.35 $\pm$ 3.37   | 13.52 $\pm$ 13.46 | 1.21 $\pm$ 3.96   | 8.12 $\pm$ 12.06  | 2.62 $\pm$ 9.01   | Std             |
| [26] | $\beta$ -himachalene       | SH                              | 29.30 | 1663            | 22.32 $\pm$ 16.18 | 34.33 $\pm$ 10.58 | 16.34 $\pm$ 15.54 | 29.23 $\pm$ 6.58  | 13.81 $\pm$ 10.95 | 15.71 $\pm$ 7.81  | RI;MS           |
| [27] | $\alpha$ -terpineol        | OM                              | 29.68 | 1684            | 0.58 $\pm$ 0.98   | tr                | 0.93 $\pm$ 0.7    | 0.54 $\pm$ 0.28   | nd                | nd                | Std             |
| [28] | Sesqui6_UNK                | SH                              | 30.00 | 1692            | nd                | nd                | 6.2 $\pm$ 5.31    | tr                | nd                | nd                | RI;MS           |
| [29] | neryl-acetate              | OM                              | 30.20 | 1730            | 1.86 $\pm$ 3.77   | 42.82 $\pm$ 15.48 | 2.3 $\pm$ 4.73    | 33.95 $\pm$ 8.05  | 2.42 $\pm$ 7.46   | 17.25 $\pm$ 13.71 | RI;MS           |
| [30] | $\delta$ -cadinene         | SH                              | 30.43 | 1739            | 13.1 $\pm$ 13.48  | tr                | 4.61 $\pm$ 5.43   | nd                | nd                | nd                | RI;MS           |
| [31] | $\beta$ -curcumene         | SH                              | 31.00 | 1754            | 3.89 $\pm$ 5.01   | 5.02 $\pm$ 11.93  | nd                | nd                | nd                | nd                | RI;MS           |
| [32] | $\alpha$ -curcumene        | SH                              | 31.23 | 1780            | 3.03 $\pm$ 4.23   | tr                | 5.35 $\pm$ 6.82   | 15.08 $\pm$ 4.41  | 12.09 $\pm$ 9.4   | 23.23 $\pm$ 7.41  | RI;MS           |
| [33] | nerol                      | OM                              | 31.84 | 1796            | 2.09 $\pm$ 1.62   | 3.05 $\pm$ 1.61   | 2.89 $\pm$ 2.57   | 2.81 $\pm$ 2.9    | nd                | nd                | Std             |
| [34] | guaiol                     | OS                              | 37.56 | 2101            | 1.21 $\pm$ 1.43   | 0.7 $\pm$ 1       | 1.19 $\pm$ 1.39   | 0.96 $\pm$ 1.32   | nd                | nd                | RI;MS           |
| [35] | rosifoliol                 | OS                              | 38.32 | 2149            | 6.18 $\pm$ 7.53   | 2.04 $\pm$ 4.97   | 5.42 $\pm$ 7.8    | 1.62 $\pm$ 1.9    | nd                | nd                | RI;MS           |

**Table S3.** Contribution of flower phytochemical compounds on the principal components (Dim.). The values reported are the square coordinates of the variables representing the contribution of the variables to the principal components. A high value indicates a good representation of the variable on the principal component.

|                            | Dim.1 | Dim.2 | Dim.3 | Dim.4 | Dim.5 |
|----------------------------|-------|-------|-------|-------|-------|
| $\alpha$ -pinene           | 0.46  | 0.03  | 0.13  | 0.00  | 0.17  |
| $\beta$ -myrcene           | 0.35  | 0.09  | 0.15  | 0.08  | 0.01  |
| $\alpha$ -terpinene        | 0.00  | 0.27  | 0.38  | 0.07  | 0.05  |
| limonene                   | 0.41  | 0.15  | 0.01  | 0.04  | 0.08  |
| 1,8-cineole                | 0.16  | 0.02  | 0.09  | 0.08  | 0.06  |
| $\gamma$ -terpinene        | 0.20  | 0.13  | 0.17  | 0.23  | 0.00  |
| $\alpha$ -ylangene         | 0.67  | 0.13  | 0.01  | 0.00  | 0.00  |
| linalool                   | 0.29  | 0.00  | 0.10  | 0.22  | 0.16  |
| italicene                  | 0.24  | 0.08  | 0.03  | 0.28  | 0.05  |
| (E)- $\alpha$ -bergamotene | 0.25  | 0.03  | 0.03  | 0.00  | 0.41  |
| $\beta$ -caryophyllene     | 0.55  | 0.11  | 0.03  | 0.00  | 0.00  |
| $\beta$ -himachalene       | 0.36  | 0.26  | 0.12  | 0.09  | 0.06  |
| $\alpha$ -terpineol        | 0.45  | 0.23  | 0.07  | 0.00  | 0.00  |
| neryl acetate              | 0.72  | 0.09  | 0.00  | 0.01  | 0.00  |
| $\delta$ cadinene          | 0.03  | 0.44  | 0.25  | 0.05  | 0.00  |
| $\alpha$ -curcumene        | 0.09  | 0.21  | 0.02  | 0.09  | 0.01  |
| nerol                      | 0.28  | 0.11  | 0.00  | 0.05  | 0.11  |
| rosifoliol                 | 0.46  | 0.03  | 0.13  | 0.00  | 0.17  |
| Proportion of variance     | 34.35 | 13.30 | 8.10  | 7.44  | 7.09  |
| Cumulative proportion      | 32.48 | 45.78 | 53.87 | 61.31 | 68.40 |



**Table S4.** Contribution of leaves phytochemical compounds on the principal components (Dim.). The values reported are the square coordinates of the variables representing the contribution of the variables on the principal components. A high value indicates a good representation of the variable on the principal component.

|                            | Dim.1 | Dim.2 | Dim.3 | Dim.4 | Dim.5 |
|----------------------------|-------|-------|-------|-------|-------|
| $\alpha$ -pinene           | 0.69  | 0.00  | 0.08  | 0.05  | 0.01  |
| $\alpha$ -fenchene         | 0.13  | 0.25  | 0.10  | 0.07  | 0.00  |
| camphene                   | 0.23  | 0.07  | 0.08  | 0.04  | 0.00  |
| $\beta$ -pinene            | 0.23  | 0.18  | 0.23  | 0.06  | 0.07  |
| $\beta$ -myrcene           | 0.47  | 0.17  | 0.01  | 0.05  | 0.02  |
| limonene                   | 0.12  | 0.58  | 0.09  | 0.05  | 0.01  |
| 1,8-cineole                | 0.27  | 0.06  | 0.31  | 0.14  | 0.03  |
| (Z)- $\beta$ -ocimene      | 0.34  | 0.34  | 0.01  | 0.02  | 0.08  |
| (E)- $\beta$ -ocimene      | 0.22  | 0.38  | 0.02  | 0.00  | 0.07  |
| p-cymene                   | 0.15  | 0.34  | 0.00  | 0.00  | 0.16  |
| terpinolene                | 0.48  | 0.11  | 0.01  | 0.06  | 0.08  |
| $\alpha$ -copaene          | 0.39  | 0.01  | 0.02  | 0.27  | 0.02  |
| $\alpha$ -thujone          | 0.34  | 0.02  | 0.02  | 0.01  | 0.01  |
| isotalicene                | 0.42  | 0.04  | 0.27  | 0.03  | 0.04  |
| italicene                  | 0.05  | 0.01  | 0.03  | 0.11  | 0.28  |
| (Z)- $\alpha$ -bergamotene | 0.30  | 0.01  | 0.14  | 0.01  | 0.30  |
| terpinen-4-ol              | 0.08  | 0.01  | 0.02  | 0.05  | 0.07  |
| $\beta$ -caryophyllene     | 0.34  | 0.05  | 0.23  | 0.08  | 0.08  |
| $\beta$ -himachalene       | 0.52  | 0.01  | 0.02  | 0.16  | 0.00  |
| $\alpha$ -terpineol        | 0.47  | 0.08  | 0.17  | 0.07  | 0.04  |
| Sesqui6_UNK                | 0.26  | 0.00  | 0.27  | 0.07  | 0.00  |
| neryl acetate              | 0.63  | 0.02  | 0.00  | 0.23  | 0.00  |
| $\delta$ -cadinene         | 0.73  | 0.00  | 0.03  | 0.00  | 0.00  |
| $\alpha$ -curcumene        | 0.45  | 0.03  | 0.09  | 0.11  | 0.00  |
| Proportion of variance     | 34.48 | 12.09 | 9.47  | 7.00  | 5.73  |
| Cumulative proportion      | 34.48 | 46.57 | 56.04 | 63.04 | 68.77 |

**Table S5.** Contribution of bark phytochemical compounds on the principal components (Dim.). The values reported are the square coordinates of the variables representing the contribution of the variables to the principal components. A high value indicates a good representation of the variable on the principal component.

|                        | Dim.1 | Dim.2 | Dim.3 | Dim.4 | Dim.5 |
|------------------------|-------|-------|-------|-------|-------|
| $\alpha$ -pinene       | 0.75  | 0.00  | 0.01  | 0.00  | 0.00  |
| camphene               | 0.26  | 0.26  | 0.14  | 0.11  | 0.04  |
| $\beta$ -pinene        | 0.27  | 0.21  | 0.09  | 0.00  | 0.03  |
| myrcene                | 0.19  | 0.40  | 0.10  | 0.00  | 0.00  |
| limonene               | 0.52  | 0.03  | 0.05  | 0.10  | 0.00  |
| $\gamma$ -terpinene    | 0.23  | 0.07  | 0.20  | 0.23  | 0.06  |
| p-cymene               | 0.02  | 0.66  | 0.10  | 0.01  | 0.02  |
| $\alpha$ -ylangene     | 0.25  | 0.13  | 0.33  | 0.00  | 0.01  |
| $\alpha$ -copaene      | 0.34  | 0.20  | 0.27  | 0.00  | 0.01  |
| isotalicene            | 0.65  | 0.00  | 0.01  | 0.21  | 0.01  |
| italicene              | 0.62  | 0.00  | 0.01  | 0.21  | 0.00  |
| $\beta$ -cariophyllene | 0.20  | 0.01  | 0.02  | 0.11  | 0.58  |
| neryl-acetate          | 0.38  | 0.00  | 0.01  | 0.07  | 0.09  |
| $\alpha$ -curcumene    | 0.48  | 0.01  | 0.01  | 0.12  | 0.05  |
| Proportion of variance | 36.98 | 14.98 | 9.50  | 8.45  | 6.40  |
| Cumulative proportion  | 36.98 | 51.15 | 60.65 | 69.09 | 75.49 |
